# Supplementary material for: Structural Characterization of Fibrils from Recombinant Human Islet Amyloid Polypeptide by Solid-State NMR: The Central FGAILS Segment Is Part of the β-Sheet Core
Source: PubMed Central journal article supplement (PMC5015977; doi:10.1371/journal.pone.0161243), 2016-09-08
Supplement: pone.0161243.s006.pdf [file pone.0161243.s006.pdf]

| Table S1, Experimental details       |             |                       |             |             |             |                  |                  |                  |                  | Sample 2    | DNP         |
|--------------------------------------|-------------|-----------------------|-------------|-------------|-------------|------------------|------------------|------------------|------------------|-------------|-------------|
| Sample 1                             |             |                       |             |             |             |                  |                  |                  |                  |             |             |
|                                      | INEPT 1D    | PDS2D                 | SPC5_3 2D   | DREAM 2D    | NHHC 2D     | NCaCB 2D         | NCaCX 3D         | NCaCB 3D         | NCOCX DARR 3D    | PDS2D       | SPC5_2 2D   |
| Mixing time                          |             | 1) 20 ms<br>2) 200 ms |             |             | 50 $\mu$ s  |                  | 80 ms            |                  | 80 ms            | 50 ms       |             |
| <sup>1</sup> H frequency (MHz)       | 600         | 800                   | 600         | 600         | 600         | 600              | 600              | 600              | 600              | 600         | 600         |
| MAS (Hz)                             | 11000       | 1) 11000<br>2) 12500  | 11000       | 22000       | 11000       | 22000            | 11000            | 22000            | 14000            | 11000       | 8000        |
| VT gas temperature                   | 0°C         | 0°C                   | 0°C         | 0°C         | 0°C         | 0°C              | 0°C              | 0°C              | -10°C            | -10°C       | 100 Kelvin  |
| Transfer 1                           | HC-CP       | HC-CP                 | HC-CP       | HC-CP       | HN-CP       | HN-CP            | HN-CP            | HN-CP            | HN-CP            | HC-CP       | HC-CP       |
| Carrier (ppm)                        | 55          | 55                    | 40          | 57          | 110         | 120              | 120              | 120              | 120              | 90          | 135         |
| Duration of 1 <sup>st</sup> transfer | 200 $\mu$ s | 200 $\mu$ s           | 600 $\mu$ s | 200 $\mu$ s | 200 $\mu$ s | 400 $\mu$ s      | 500 $\mu$ s      | 400 $\mu$ s      | 400 $\mu$ s      | 200 $\mu$ s | 150 $\mu$ s |
| Transfer 2                           |             | -                     | -           | -           | NH-CP       | N-CA SPECIFIC CP | N-CA SPECIFIC CP | N-CA SPECIFIC CP | N-CO SPECIFIC CP |             |             |
| Carrier (ppm)                        |             | -                     | -           | -           | 110         | 55               | 55               | 50               | 170              |             |             |
| Duration of 2 <sup>nd</sup> transfer |             |                       |             |             | 200 $\mu$ s | 1200 $\mu$ s     | 1300 $\mu$ s     | 1350 $\mu$ s     | 1600 $\mu$ s     |             |             |
| t1 increments                        | 758         | 750                   | 463         | 938         | 463         | 476              | 1172             | 417              | 537              | 758         | 512         |
| t1 spectral width (kHz)              | 37.8        | 62.5                  | 46          | 78.1        | 46          | 60               | 77.7             | 60               | 44               | 37.8        | 44          |
| t2 increments                        |             | 240                   | 120         | 128         | 16          | 27               | 8                | 12               | 14               | 160         | 160         |
| t2 spectral width (kHz)              |             | 40                    | 22          | 18          | 4           | 3.6              | 2.4              | 2.4              | 2.4              | 33          | 38          |
| t3 increments                        |             |                       |             |             |             |                  | 18               | 18               | 15               |             |             |
| t3 spectral width (kHz)              |             |                       |             |             |             |                  | 4.5              | 4.5              | 3                |             |             |
| Number of scans                      | 128         | 212                   | 256         | 176         | 4928        | 2944             | 640              | 352              | 432              | 1008        | 32          |
| Duration                             | < 1 h       | 63 h                  | 24 h        | 24 h        | 84 h        | 144 h            | 216 h            | 254 h            | 216 h            | 187 h       | 7 h         |

### S1 Table Experimental details.

Sample 1 is fully <sup>13</sup>C, <sup>15</sup>N-labeled fibrillar IAPP. Sample 2 is fibrillar IAPP with 1 part <sup>13</sup>C, <sup>15</sup>N-labeled per 4 parts unlabeled peptide. Both samples were expressed and purified equally as described in methods part.
