# Supplementary material for: Structural Characterization of Fibrils from Recombinant Human Islet Amyloid Polypeptide by Solid-State NMR: The Central FGAILS Segment Is Part of the β-Sheet Core
Source: PubMed Central journal article supplement (PMC5015977; doi:10.1371/journal.pone.0161243), 2016-09-08
Supplement: pone.0161243.s007.pdf [file pone.0161243.s007.pdf]

| S2 Table, Chemical shifts in ppm |         |       |       |      |            |           |           |       |       |
|----------------------------------|---------|-------|-------|------|------------|-----------|-----------|-------|-------|
|                                  | residue | N     | CO    | Ca   | Cb         | Cg        | Cd        | Ce    | Cz    |
| 1                                | K       | 123.0 | 174.1 | 54.6 | 32.8       | 25.1      | 29.7      | 41.9  |       |
| 2                                | c       | 125.2 | 173.6 | 59.2 | 43.5       |           |           |       |       |
| 3                                | N       | 114.2 | 176.6 | 51.3 | 39.1       | 176.6     |           |       |       |
| 4                                | T       | 119.7 | 175.8 | 62.1 | 66.1       | 23.9      |           |       |       |
| 5                                | A       | 119.3 | 176.4 | 51.0 | 26.8       |           |           |       |       |
| 6                                | T       | 117.1 | 174.0 | 61.7 | 70.2       | 21.4      |           |       |       |
| 7                                | c       | 120.3 | 173.1 | 53.2 | 48.7       |           |           |       |       |
| 8                                | A       | 122.2 | 175.5 | 50.7 | 22.7       |           |           |       |       |
| 9                                | T       | 119.1 | 172.5 | 61.8 | 70.3       | 21.9      |           |       |       |
| 10                               | Q       | 125.8 | 174.3 | 54.4 | 32.2       | 34.2      | 179.5     |       |       |
| 11                               | R       | 125.2 | 173.5 | 54.9 | 30.5       | 27.3      | 43.8      |       | 159.6 |
| 12                               | L       | 127.9 | 172.7 | 54.8 | 44.2       | 29.3      | 25.1      |       |       |
| 13                               | A       | 129.4 | 174.5 | 51.4 | 21.2       |           |           |       |       |
| 14                               | N       | 120.5 | 173.2 | 52.5 | 42.8       | 177.3     |           |       |       |
| 15                               | F       | 117.1 | 173.2 | 56.6 | 42.7       | 137.9     | 131.6     |       |       |
| 16                               | L       | 119.2 | 173.9 | 56.1 | 42.0       | 30.4      | 25.1/27.6 |       |       |
| 17                               | V       | 120.7 | 174.5 | 60.7 | 35.8       | 21.5      |           |       |       |
| 18                               | H       | 122.0 | 175.0 | 54.3 | 28.2       | 131.6     |           |       |       |
| 19                               | S       | 124.0 | 174.0 | 55.9 | 64.5       |           |           |       |       |
| 20                               | S       | 124.2 | 174.7 | 55.9 | 64.5       |           |           |       |       |
| 21                               | N       | 127.3 | 173.0 | 54.2 | 36.4       |           |           |       |       |
| 22                               | N       | 118.1 | 172.2 | 52.5 | 42.3       |           |           |       |       |
| 23                               | F       | 121.1 | 173.7 | 57.1 | 40.2       | 137.8     | 131.4     |       |       |
| 24                               | G       | 109.9 | 171.3 | 43.9 |            |           |           |       |       |
| 25                               | A       | 127.9 | 176.8 | 50.4 | 21.8       |           |           |       |       |
| 26                               | I       | 120.4 | 177.0 | 60.1 | 40.5       | 16.9/27.6 | 12.4      |       |       |
| 27                               | L       | 121.5 | 173.6 | 54.2 | 44.5       | 29.3      | 23.7/26.8 |       |       |
| 28                               | S       | 116.3 | 173.6 | 55.8 | 64.5       |           |           |       |       |
| 29                               | S       | 117.5 | 173.7 | 58.9 | 61.7/63.7* |           |           |       |       |
| 30                               | T       | 114.4 | 171.4 | 61.3 | 74.0       | 21.3      |           |       |       |
| 31                               | N       | 122.3 | 173.9 | 52.3 | 41.3       | 176.1     |           |       |       |
| 32                               | V       | 121.7 | 174.8 | 60.5 | 34.6       | 20/22.2   |           |       |       |
| 33                               | G       | 116.7 | 174.0 | 48.0 |            |           |           |       |       |
| 34                               | S       | 113.1 | 171.7 | 58.4 | 68.4       |           |           |       |       |
| 35                               | N       | 120.0 | 174.3 | 52.5 | 41.9       | 176.9     |           |       |       |
| 36                               | T       | 114.4 | 173.3 | 60.7 | 71.4       | 21.5      |           |       |       |
| 37                               | Y       | 128.5 | 180.7 | 60.0 | 39.5       | 129.1     | 132.8     | 117.8 | 156.1 |

### S2 Table Chemical shifts in ppm.

Chemical shifts in ppm derived from solid-state NMR experiments and used for TALOS-N predictions and calculation of secondary chemical shifts. Small letters for cysteine residues indicate the oxidized disulfide bridge. The oxidation state is considered by TALOS-N routine. \*The second C $\beta$  chemical shift value of 63.7 ppm for S29 corresponds to an additional conformation as observed in the first sample (weak) and in the second sample (strong).
