# Supplementary material for: Structural Characterization of Fibrils from Recombinant Human Islet Amyloid Polypeptide by Solid-State NMR: The Central FGAILS Segment Is Part of the β-Sheet Core
Source: PubMed Central journal article supplement (PMC5015977; doi:10.1371/journal.pone.0161243), 2016-09-08
Supplement: pone.0161243.s008.pdf [file pone.0161243.s008.pdf]

| S3 Table, TALOS-N backbone torsion angle predictions |         |        |        |                 |                 |                |
|------------------------------------------------------|---------|--------|--------|-----------------|-----------------|----------------|
|                                                      | residue | $\Phi$ | $\Psi$ | $\sigma_{\Phi}$ | $\sigma_{\Psi}$ | classification |
| 1                                                    | K       | -      | -      | -               | -               | None           |
| 2                                                    | C       | -69,0  | -31,7  | 9,8             | 8,8             | Warn           |
| 3                                                    | N       | -110,0 | 129,3  | 19,8            | 47,4            | Warn           |
| 4                                                    | T       | -66,3  | 138,5  | 9,2             | 13,2            | Warn           |
| 5                                                    | A       | -144,5 | 156,0  | 11,2            | 8,2             | Strong         |
| 6                                                    | T       | -100,8 | 134,6  | 15,8            | 11,3            | Strong         |
| 7                                                    | C       | -138,3 | 159,4  | 9,5             | 8,0             | Strong         |
| 8                                                    | A       | -135,6 | 140,7  | 12,2            | 10,0            | Strong         |
| 9                                                    | T       | -110,8 | 128,9  | 14,3            | 7,0             | Strong         |
| 10                                                   | Q       | -120,1 | 133,4  | 10,6            | 9,4             | Strong         |
| 11                                                   | R       | -97,0  | 124,5  | 9,9             | 10,9            | Strong         |
| 12                                                   | L       | -118,0 | 129,1  | 10,5            | 7,4             | Strong         |
| 13                                                   | A       | -117,9 | 132,1  | 10,0            | 6,6             | Strong         |
| 14                                                   | N       | -123,1 | 141,0  | 15,0            | 11,2            | Strong         |
| 15                                                   | F       | -136,2 | 143,5  | 12,3            | 11,1            | Strong         |
| 16                                                   | L       | -76,4  | 132,1  | 11,0            | 7,9             | Strong         |
| 17                                                   | V       | -126,5 | 134,3  | 11,6            | 11,5            | Strong         |
| 18                                                   | H       | -91,9  | 119,3  | 10,5            | 7,5             | Strong         |
| 19                                                   | S       | -105,5 | 118,0  | 10,8            | 24,8            | Strong         |
| 20                                                   | S       | -127,0 | 132,9  | 10,0            | 13,3            | Strong         |
| 21                                                   | N       | 49,2   | 47,4   | 5,2             | 6,3             | Warn           |
| 22                                                   | N       | -131,4 | 156,0  | 15,1            | 12,5            | Strong         |
| 23                                                   | F       | -104,8 | 129,3  | 15,0            | 7,7             | Strong         |
| 24                                                   | G       | -113,7 | 148,8  | 19,0            | 10,6            | Strong         |
| 25                                                   | A       | -119,5 | 128,3  | 11,0            | 6,4             | Strong         |
| 26                                                   | I       | -111,7 | 134,2  | 12,4            | 10,7            | Strong         |
| 27                                                   | L       | -122,3 | 131,1  | 12,2            | 12,2            | Strong         |
| 28                                                   | S       | -125,8 | 133,6  | 10,0            | 9,6             | Strong         |
| 29                                                   | S       | 50,1   | 52,3   | 4,5             | 8,5             | Warn           |
| 30                                                   | T       | -139,3 | 151,8  | 8,8             | 11,4            | Strong         |
| 31                                                   | N       | -112,0 | 129,5  | 14,6            | 12,5            | Strong         |
| 32                                                   | V       | -122,4 | 128,5  | 10,1            | 13,0            | Strong         |
| 33                                                   | G       | -133,3 | 168,7  | 45,2            | 34,9            | Warn           |
| 34                                                   | S       | -147,6 | 152,7  | 9,4             | 8,0             | Strong         |
| 35                                                   | N       | -128,2 | 142,2  | 18,2            | 10,9            | Strong         |
| 36                                                   | T       | -114,1 | 140,2  | 17,7            | 14,7            | Strong         |
| 37                                                   | Y       | -      | -      | -               | -               | None           |

**S3 Table TALOS-N backbone torsion angle predictions.**

Predicted backbone torsion angles for chemical shifts from S2 Table. The Classification describes the consensus of the torsion angle with database values. “Warn” means that there is no consensus in database matches. “Strong” indicates a major consensus in database matches.
